# Supplementary material for: Direct and Indirect Effects of Cancer Screening Invitations on Participation in Europe: A Quasi-Experimental Analysis
Source: Research Square preprint supplement (doi:10.21203/rs.3.rs-7891986/v1), 2025-11-04
Supplement: Supplementary file 1 [file d9bc9c885c304c569157d66b.docx]

**Supplementary data**

**Table S1 Target population of the organized screening programs (OSPs)**

| **Country** | **Breast cancer** | **Cervical cancer** | **Colorectal cancer** |
| --- | --- | --- | --- |
| Belgium | 50-69 | 25-64 | 50-74 |
| Bulgaria | none | none | none |
| Cyprus | 50-69 | none | 50-69 |
| Czech Republic | 45+ | 25-60 | 50-70 |
| Germany | 50-69 | 20-65 | 50+ |
| Denmark | 50-69 | 23-64 | 50-74 |
| Estonia | 50-69 | 30-59 | 60-69 |
| Greece | none | none | none |
| Spain | 45-69  50-69 | 25-64 | 50-69 |
| Finland | 50-69 | 25-65 | 60-69 |
| Croatia | 50-69 | 25-64 | 50-74 |
| Hungary | 45-64 | 25-65 | 50-70 |
| Ireland | 50-69 | 25-65 | 60-69 |
| Iceland | 50-69 | 23-65 | none |
| Lithuania | 50-69 | 25-60 | 50-74 |
| Luxemburg | 50-69 | none | 55-74 |
| Latvia | 50-69 | 25-69 | none |
| Malta | 50-69 | 25-64 | 55-69 |
| Netherlands | 50-75 | 30-60 | 55-75 |
| Norway | 50-69 | none | none |
| Poland | 50-69 | 25-59 | none |
| Portugal | 45-74  50-69 | 25-60  25-64 | 50-70  50-74  none |
| Romania | none | none | none |
| Serbia | 50-69 | 25-64 | 50-74 |
| Slovenia | 50-69 | 20-64 | 50-74 |
| Slovakia | 50-69 | 23-64 | none |
| Sweden | 40-74 | 23-70 | 60-69  none |

Note: Target population of Organized screening programs (OSPs) receiving regular invitation to screen as 2019. Countries with more than one target population are those where the target age range differs by region. For colorectal cancer, the target population considered is the one for FOBT.

**Table S2: Sample construction**

| Sample of women (EHIS 3 version downloaded in May 2025) | N=167,112 |
| --- | --- |
| Exclusion of Italy and Austria | N= 134,723 |
| Exclusion of 15, 16 and over 90 years old | N= 131,234 |
| Exclusion of missing or proxy replies for pap, mammography, and fobt | N=122,952 |

**Table S3 Descriptive statistics**

|  | **Means** | **Std. dev.** |
| --- | --- | --- |
| **OUTCOMES** |  |  |
| Mammography in the last 2 years | .3580666 | .4794338 |
| Pap test in the last 3 years | .5792179 | .4936866 |
| FOBT in the last 2 years | .1790943 | .3834328 |
| **DIRECT EFFECT: treatment** |  |  |
| Breast cancer | .3580096 | .4794169 |
| Cervical cancer | .377383 | .4847339 |
| Colorectal cancer | .2614598 | .4394316 |
| **SPILLOVER EFFECT:** |  |  |
| **Breast cancer** |  |  |
| None | .6419904 | .4794169 |
| OSP | .0609099 | .239166 |
| OSP+ | .1918879 | .393787 |
| OSP++ | .1052118 | .3068274 |
| **Cervical cancer** |  |  |
| None | .622617 | .4847339 |
| OSP | .1943767 | .3957217 |
| OSP+ | .0777946 | .2678492 |
| OSP++ | .1052118 | .3068274 |
| **Colorectal cancer** |  |  |
| None | .7385402 | .4394316 |
| OSP | .0412763 | .1989293 |
| OSP+ | .1149717 | .3189891 |
| OSP++ | .1052118 | .3068274 |
| **CONFOUNDING FACTORS:** |  |  |
| **Age ( min:17, max:90)** | 53.30134 | 18.17531 |
| **Educational attainment** |  |  |
| Low | .2797921 | .4488988 |
| Medium | .4012704 | .4901575 |
| High | .3136915 | .4639945 |
| *Missing* | .0052459 | .072239 |
| **Net monthly equalized income** |  |  |
| < 1st quintile | .1830796 | .3867333 |
| 1st quintile - 2nd quintile | .198549 | .3989093 |
| 2nd quintile - 3rd quintile | .1870811 | .3899782 |
| 3rd quintile - 4th quintile | .1864223 | .3894487 |
| 4th quintile - 5th quintile | .1770854 | .3817425 |
| *Missing* | .0677825 | .2513734 |
| **Labor status** |  |  |
| Employed | .4507694 | .4975725 |
| Unemployed | .2331886 | .422863 |
| Retired | .3110075 | .4629078 |
| *Missing* | .0050345 | .0707756 |
| **Type of household** |  |  |
| One-person household | .2330991 | .4228065 |
| Lone parent with children | .0524432 | .22292 |
| Couple without children | .2626065 | .4400522 |
| Couple with children <25 | .2361409 | .4247115 |
| Couple with children >25 | .0509223 | .21984 |
| Other type of household | .1558657 | .3627295 |
| *Missing* | .0089222 | .0940354 |
| **Degree of urbanization** |  |  |
| Densely-populated | .3630604 | .480884 |
| Intermediate-populated area | .2945052 | .4558219 |
| Thinly-populated area | .2905443 | .4540154 |
| *Missing* | .0518902 | .2218062 |
| **Self-perceived health** |  |  |
| Very good | .2154093 | .4111076 |
| Good | .4120795 | .4922113 |
| Fair | .2709757 | .4444654 |
| Bad or very bad | .0970704 | .2960548 |
| *Missing* | .0044652 | .0666728 |
| **Long-standing health problem** |  |  |
| Yes | .4554623 | .4980145 |
| *No* | .5383158 | .4985318 |
| *Missing* | .0062219 | .0786338 |
| **N** | **122,952** |  |

**Table S4 Treatment effect of OSP on participation**

|  | **(1)** | **(2)** | **(3)** |
| --- | --- | --- | --- |
| VARIABLES | **Mammography** | **Pap test** | **FOBT** |
| **Treatment** | 0.333*** | 0.0903*** | 0.197*** |
|  | (0.0432) | (0.0202) | (0.0274) |
| **Educational attainment** *(ref: Low)* |  |  |  |
| Medium | 0.0435*** | 0.0710*** | 0.00852 |
|  | (0.00735) | (0.00655) | (0.00536) |
| High | 0.0551*** | 0.109*** | 0.0155** |
|  | (0.00992) | (0.00809) | (0.00639) |
| *Missing* | 0.0120 | 0.00588 | 0.0306 |
|  | (0.0175) | (0.0235) | (0.0218) |
| **Net monthly equalized income** *(ref:< 1st quintile)* |  |  |  |
| 1st quintile - 2nd quintile | 0.0118** | 0.0222*** | 0.00684* |
|  | (0.00469) | (0.00576) | (0.00396) |
| 2nd quintile - 3rd quintile | 0.0250*** | 0.0384*** | 0.00668 |
|  | (0.00516) | (0.00683) | (0.00467) |
| 3rd quintile - 4th quintile | 0.0419*** | 0.0595*** | 0.00305 |
|  | (0.00500) | (0.00572) | (0.00606) |
| 4th quintile - 5th quintile | 0.0681*** | 0.0804*** | 0.0140* |
|  | (0.00704) | (0.00682) | (0.00756) |
| *Missing* | 0.0371*** | 0.0569*** | 0.00801 |
|  | (0.00680) | (0.00958) | (0.00668) |
| **Labor status** (*ref: Employed*) |  |  |  |
|  |  |  |  |
| Unemployed | -0.0202*** | -0.0435*** | -0.000749 |
|  | (0.00395) | (0.00599) | (0.00356) |
| Retired | -0.0163 | -0.0291** | -0.0179** |
|  | (0.0110) | (0.0116) | (0.00873) |
| *Missing* | -0.00296 | -0.0391* | -0.00543 |
|  | (0.0173) | (0.0207) | (0.0177) |
| **Type of household** *(ref: One-person household)* |  |  |  |
| Lone parent with children | 0.0163** | 0.0549*** | -0.0110* |
|  | (0.00740) | (0.00800) | (0.00573) |
| Couple without children | 0.0343*** | 0.0425*** | 0.0180*** |
|  | (0.00531) | (0.00500) | (0.00551) |
| Couple with children <25 | 0.0189*** | 0.0567*** | -0.0135*** |
|  | (0.00584) | (0.00546) | (0.00502) |
| Couple with children >25 | 0.0124 | 0.00804 | 0.00375 |
|  | (0.00793) | (0.00870) | (0.00816) |
| Other type of household | 0.00412 | -0.00394 | -0.00598 |
|  | (0.00540) | (0.00638) | (0.00374) |
| *Missing* | 0.0215** | 0.0110 | -0.00174 |
|  | (0.00990) | (0.0118) | (0.0142) |
| **Degree of urbanization** *(ref: Densely-populated)* |  |  |  |
| Intermediate-populated area | -0.00720 | -0.0179*** | 0.00310 |
|  | (0.00449) | (0.00608) | (0.00535) |
| Thinly-populated area | -0.0208*** | -0.0290*** | -0.00144 |
|  | (0.00614) | (0.00695) | (0.00480) |
| Missing | -0.0306*** | -0.0308*** | 0.0259*** |
|  | (0.00583) | (0.00711) | (0.00506) |
| **Self-perceived health** *(ref: Very good)* |  |  |  |
| Good | -0.00482 | -0.00259 | -0.00220 |
|  | (0.00540) | (0.00525) | (0.00432) |
| Fair | -0.0102 | -0.0191*** | 0.0197*** |
|  | (0.00803) | (0.00724) | (0.00593) |
| Bad or very bad | -0.0177** | -0.0363*** | 0.0420*** |
|  | (0.00797) | (0.00988) | (0.00671) |
| Missing | -0.000993 | -0.0892*** | 0.0128 |
|  | (0.0266) | (0.0283) | (0.0217) |
| **Long-standing health problem** |  |  |  |
| Yes | 0.0171*** | 0.0235*** | 0.0211*** |
|  | (0.00388) | (0.00395) | (0.00379) |
| Missing | -0.0109 | 0.00124 | -0.00230 |
|  | (0.0189) | (0.0193) | (0.0183) |
| **N** | 122,952 | 122,952 | 122,952 |
| **Mean control group** | 18.60 | 47.44 | 10.67 |
| **Std. dev. control group** | 38.91 | 49.93 | 30.87 |

Note: Estimations include region and age fixed effects. Region level clustered standard errors are in parentheses. *** p<0.01, ** p<0.05, * p<0.1

**Table S5 Cross program spillover effects**

|  | mammo | t-test p-value | pap | t-test p-value | fobt | t-test p-value |
| --- | --- | --- | --- | --- | --- | --- |
|  |  |  |  |  |  |  |
| OSP | 0.255*** | OSP – OSP++: | 0.0856*** | OSP – OSP++: | 0.133*** | OSP – OSP++ |
|  | (0.0382) | 0.0007 | (0.0208) | 0.9731 | (0.0220) | 0.0002 |
| OSP + | 0.357*** | OSP – OSP+ | 0.122*** | OSP – OSP+ | 0.210*** | OSP – OSP+ |
|  | (0.0447) | 0.0002 | (0.0270) | 0.0322 | (0.0355) | 0.0040 |
| OSP ++ | 0.367*** | OSP+ OSP++ | 0.0861*** | OSP+ OSP++ | 0.218*** | OSP+ OSP++ |
|  | (0.0511) | 0.6634 | (0.0215) | 0.0538 | (0.0315) | 0.8040 |
| N | 122,952 |  | 122,952 |  | 122,952 |  |
| Mean control group (%) | 18.60 |  | 47.44 |  | 10.67 |  |
| St. dev. control group (%) | 38.91 |  | 49.93 |  | 30.87 |  |

Note: Region level clustered standard errors are in parentheses. Each column is a different regression. All regressions include age and region fixed effects. *** p<0.01, ** p<0.05, * p<0.1

**Table S6 Cross program spillover effects: including confounding factors**

|  | **(1)** | **(2)** | **(3)** |
| --- | --- | --- | --- |
| VARIABLES | **Mammography** | **Pap test** | **FOBT** |
| **Treatment** *(ref: none)* |  |  |  |
| OSP | 0.257*** | 0.0818*** | 0.137*** |
|  | (0.0386) | (0.0203) | (0.0220) |
| OSP + | 0.357*** | 0.115*** | 0.212*** |
|  | (0.0440) | (0.0252) | (0.0351) |
| OSP++ | 0.369*** | 0.0866*** | 0.220*** |
|  | (0.0509) | (0.0215) | (0.0314) |
| **Educational attainment** *(ref: Low)* |  |  |  |
| Medium | 0.0455*** | 0.0709*** | 0.0106** |
|  | (0.00728) | (0.00653) | (0.00520) |
| High | 0.0562*** | 0.109*** | 0.0173*** |
|  | (0.00991) | (0.00812) | (0.00624) |
| *Missing* | 0.0146 | 0.00840 | 0.0322 |
|  | (0.0174) | (0.0230) | (0.0218) |
| **Net monthly equalized income** *(ref:< 1st quintile)* |  |  |  |
| 1st quintile - 2nd quintile | 0.0112** | 0.0222*** | 0.00676* |
|  | (0.00471) | (0.00573) | (0.00393) |
| 2nd quintile - 3rd quintile | 0.0242*** | 0.0383*** | 0.00711 |
|  | (0.00519) | (0.00684) | (0.00471) |
| 3rd quintile - 4th quintile | 0.0406*** | 0.0593*** | 0.00349 |
|  | (0.00494) | (0.00572) | (0.00599) |
| 4th quintile - 5th quintile | 0.0662*** | 0.0799*** | 0.0140* |
|  | (0.00697) | (0.00689) | (0.00738) |
| *Missing* | 0.0361*** | 0.0567*** | 0.00817 |
|  | (0.00672) | (0.00955) | (0.00666) |
| **Labour status** (*ref: Employed*) |  |  |  |
|  |  |  |  |
| Unemployed | -0.0205*** | -0.0434*** | -0.000263 |
|  | (0.00399) | (0.00600) | (0.00351) |
| Retired | -0.0122 | -0.0283** | -0.0145* |
|  | (0.0105) | (0.0114) | (0.00798) |
| *Missing* | -0.00317 | -0.0405** | -0.00479 |
|  | (0.0172) | (0.0205) | (0.0178) |
| **Type of household** *(ref: One-person household)* |  |  |  |
| Lone parent with children | 0.0151** | 0.0548*** | -0.0108* |
|  | (0.00759) | (0.00800) | (0.00579) |
| Couple without children | 0.0347*** | 0.0426*** | 0.0179*** |
|  | (0.00532) | (0.00496) | (0.00551) |
| Couple with children <25 | 0.0180*** | 0.0566*** | -0.0134*** |
|  | (0.00597) | (0.00548) | (0.00502) |
| Couple with children >25 | 0.0115 | 0.00846 | 0.00378 |
|  | (0.00793) | (0.00868) | (0.00813) |
| Other type of household | 0.00418 | -0.00397 | -0.00621 |
|  | (0.00541) | (0.00636) | (0.00377) |
| *Missing* | 0.0217** | 0.0104 | -0.00229 |
|  | (0.0100) | (0.0118) | (0.0141) |
| **Degree of urbanization** *(ref: Densely-populated)* |  |  |  |
| Intermediate-populated area | -0.00732 | -0.0181*** | 0.00315 |
|  | (0.00447) | (0.00605) | (0.00535) |
| Thinly-populated area | -0.0209*** | -0.0293*** | -0.00167 |
|  | (0.00611) | (0.00692) | (0.00478) |
| Missing | -0.0307*** | -0.0309*** | 0.0254*** |
|  | (0.00587) | (0.00711) | (0.00513) |
| **Self-perceived health** *(ref: Very good)* |  |  |  |
| Good | -0.00482 | -0.00193 | -0.00217 |
|  | (0.00542) | (0.00513) | (0.00438) |
| Fair | -0.00876 | -0.0185** | 0.0197*** |
|  | (0.00817) | (0.00721) | (0.00600) |
| Bad or very bad | -0.0176** | -0.0361*** | 0.0413*** |
|  | (0.00805) | (0.00995) | (0.00675) |
| Missing | 0.000800 | -0.0886*** | 0.0133 |
|  | (0.0266) | (0.0284) | (0.0220) |
| **Long-standing health problem** |  |  |  |
| Yes | 0.0174*** | 0.0236*** | 0.0206*** |
|  | (0.00388) | (0.00395) | (0.00379) |
| Missing | -0.0116 | 0.000850 | -0.00240 |
|  | (0.0189) | (0.0192) | (0.0185) |
| **N** | 122,952 | 122,952 | 122,952 |
| **mean control group** | 18.60 | 47.44 | 10.67 |
| **Std dev. control group** | 38.91 | 49.93 | 30.87 |

Note: Estimations include region and age fixed effects. Region level clustered standard errors are in parentheses. *** p<0.01, ** p<0.05, * p<0.1
